# Supplementary material for: An interlaced silver vanadium oxide–graphene hybrid with high structural stability for use in lithium ion batteries
Source: Royal Society of Chemistry journal article supplement (doi:10.1039/c4cc05065g), 2014-01-01
Supplement: c4cc05065g1.pdf [file c4cc05065g1.pdf]

## Supporting Information

# An Interlaced Silver Vanadium Oxide-Graphene Hybrid with High Structural Stability for Use in Lithium Ion Batteries

Jiwen Qin<sup>a,†</sup>, Wei Lv<sup>a,†</sup>, Zhengjie Li<sup>b</sup>, Baohua Li<sup>a\*</sup>, Feiyu Kang<sup>a</sup> and Quan-Hong Yang<sup>a,b\*</sup>

<sup>a</sup> *Engineering Laboratory for Functionalized Carbon Materials, Graduate School at Shenzhen, Tsinghua University, Shenzhen 518055, China; yang.quanhong@sz.tsinghua.edu.cn; libh@sz.tsinghua.edu.cn.*

<sup>b</sup> *Key Laboratory for Green Chemical Technology of Ministry of Education, School of Chemical Engineering and Technology, Tianjin University, Tianjin 300072, China; qhyangcn@tju.edu.cn.*

### 1. Sample preparation

Graphite oxide was prepared from nature flake graphite by a modified Hummers method. As prepared graphite oxide was then dispersed in deionized water to obtain a homogeneous graphene oxide (GO) hydrosol by ultrasonication (200 W, JY92-N, a high-energy bench mounted ultrasonic disintegrator) for 2 h.

The SVO-graphene hybrids were prepared by a facile hydrothermal approach under the reaction of AgNO<sub>3</sub> with NH<sub>4</sub>VO<sub>3</sub> in the presence of GO in a Teflon-lined autoclave. In a typical procedure, AgNO<sub>3</sub> (170 mg) was dispersed in 40 mL GO hydrosol (1 mg mL<sup>-1</sup>) by a sonication for 1 h to obtain a homogenous mixed dispersion. At the same time, NH<sub>4</sub>VO<sub>3</sub> (117 mg) was dissolved in 40 mL deionized water and heated at 80 °C with consecutive stirring until the color of solution became pale yellow. Then, the NH<sub>4</sub>VO<sub>3</sub> solution was slowly added to the above mixed dispersion under ultrasonication with the pH value of about 2.5~2.7. In order to mix it uniformly, another one hour sonication was conducted. After that, the final mixture suspension was transferred into a 120 mL autoclave and heated in an oven at 180°C for 12 h, and the obtained product was collected by centrifugation at 8000 rpm for 10 min and washed with ethanol and deionized water for at least 4 times. Finally, the SVO-graphene hybrid (also denoted as SVO-graphene (40)) was obtained after being freeze-dried for 36 h. In order to investigate the influence of GO contents on the structure and electrochemical

performance, the concentration of GO hydrosol was changed to 0.5 mg mL<sup>-1</sup>, 1 mg mL<sup>-1</sup>, 2 mg mL<sup>-1</sup> and 3 mg mL<sup>-1</sup>, and the obtained samples were denoted as the SVO-graphene (20), SVO-graphene (40) (simply denoted as SVO-graphene in the manuscript), SVO-graphene (80) and SVO-graphene (120) according to the weight of GO added. A control sample was prepared under the same condition without the introduction of GO.

## **2. Characterization**

The morphology and structure of the obtained samples were characterized by field emission scanning electron microscopy (SEM, Hitachi S-4800) equipped with an energy-dispersive X-ray spectroscopy, transmission electron microscopy (TEM, JEOL, JEM-2100F) at an accelerating voltage of 200 kV and X-ray diffraction (XRD, Rigaku D/max 2500/PC using Cu K $\alpha$  radiation,  $\lambda=1.5418\text{\AA}$ ). Atomic force microscopy (AFM) image was obtained on Dimension Icon (ScanAsyst, Bruker). Raman spectra were recorded with a LabRAM HR800 (Horiba) using 532nm incident radiation. The X-ray photoelectron spectroscopy (XPS) characterization of the products was performed on an Axis Ultra photoelectron spectrometer using an Al K $\alpha$  (1486.7 eV) X-ray source.

## **3. Electrochemical measurements**

The electrochemical properties of the SVO-graphene hybrids were studied as the active material in coin cells. The cathode electrodes were composed of 80 wt% active material, 10 wt% acetylene black and 10 wt% polyvinylidene fluoride (PVDF). A solution (1 M) of LiPF<sub>6</sub> in EC/DEC (1:1 v/v) was used as the electrolyte. The cells were assembled in an argon-filled glove box. Galvanostatic charge/discharge measurement was performed by a multichannel battery testing system (LAND CT2001A) in the voltage range of 1.5 V~3.7 V. Cycling voltammetry (CV) were tested with an electrochemical workstation (VMP3, Bio-Logic, France) with a voltage range from 1.5 V to 3.7 V at a scan rate of 0.1 mV/s. The electrochemical impedance spectroscopy (EIS) was carried out with the frequency range from

100 kHz to 10 mHz on the electrochemical workstation (VMP3, Bio-Logic, France) by applying a 5 mV of AC oscillation. All the measurements were carried out at room temperature.

#### 4. Supplementary Figures

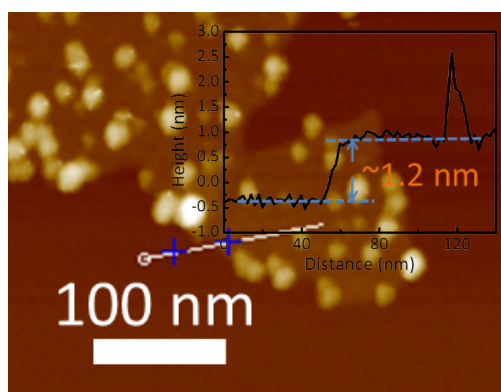

**Fig. S1** AFM image of GO sheet after mixed with  $\text{AgNO}_3$  and the inset height profile shows the thickness of the GO is about 1.2 nm.

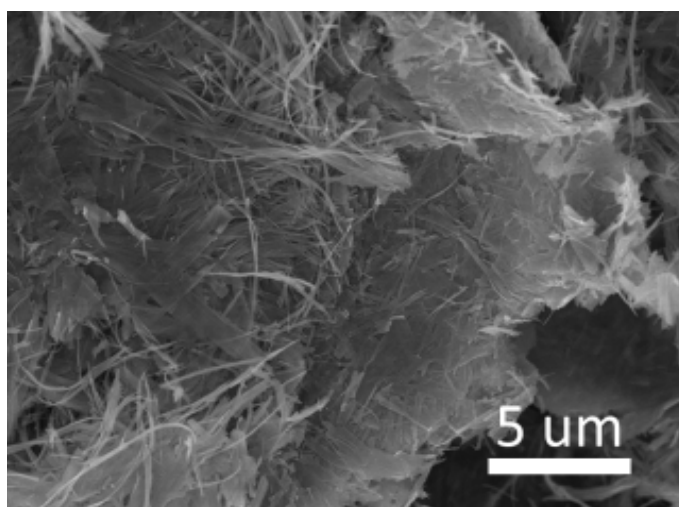

**Fig. S2** Typical SEM image of the pure SVO without graphene.

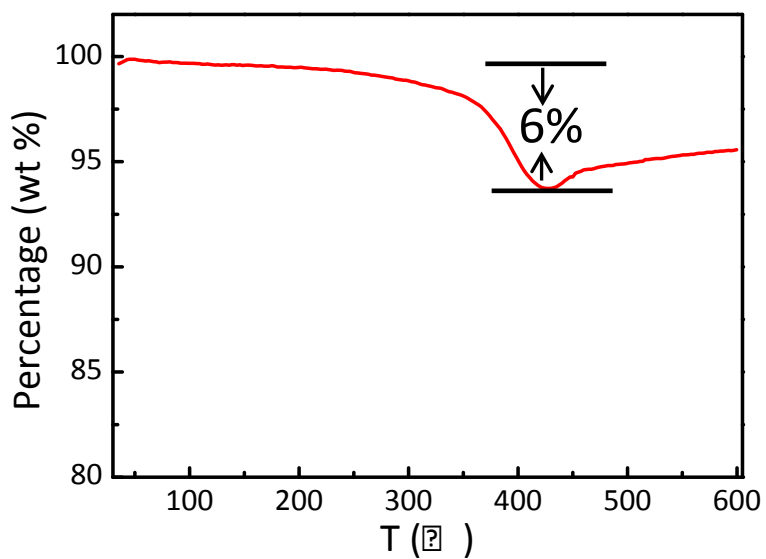

**Fig. S3** TG curve of the SVO-graphene (40) hybrid (simply denoted as SVO-graphene in the manuscript).

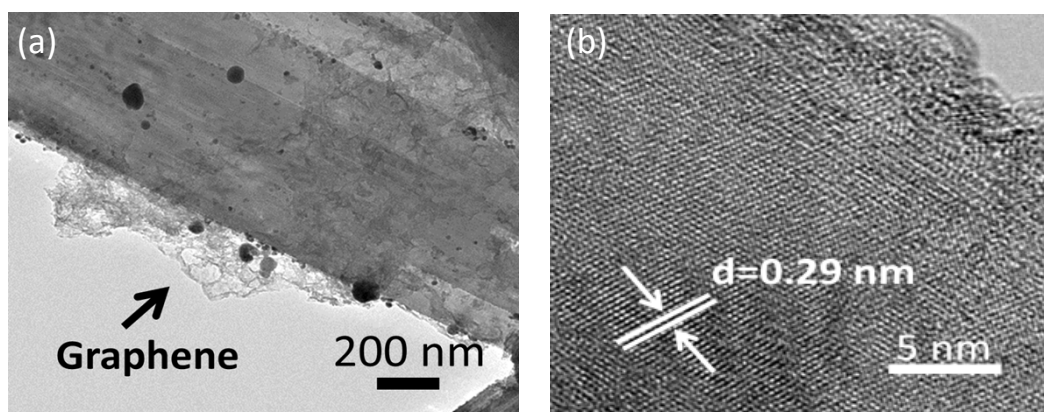

**Fig. S4** TEM and HRTEM image of the SVO-graphene (40) hybrid synthesized in 12 h. The HRTEM of SVO-graphene (40) hybrid shows a well-defined crystalline structure with a lattice space of 0.29 nm, corresponding to the (003) plane of  $\text{Ag}_{1-x}\text{V}_2\text{O}_5$ .

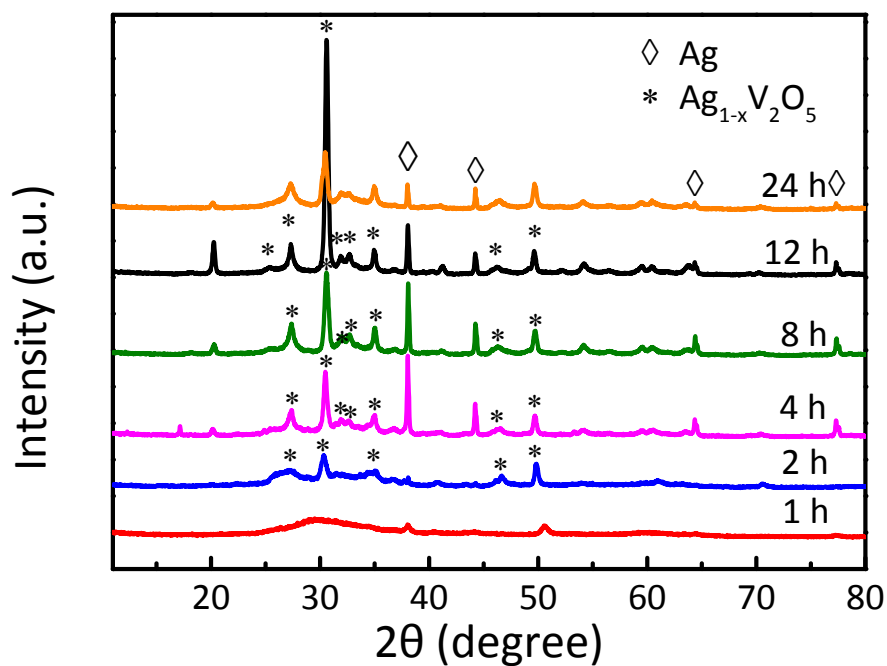

**Fig. S5** XRD patterns of the SVO-graphene (40) hybrids hydrothermally treated with different time.

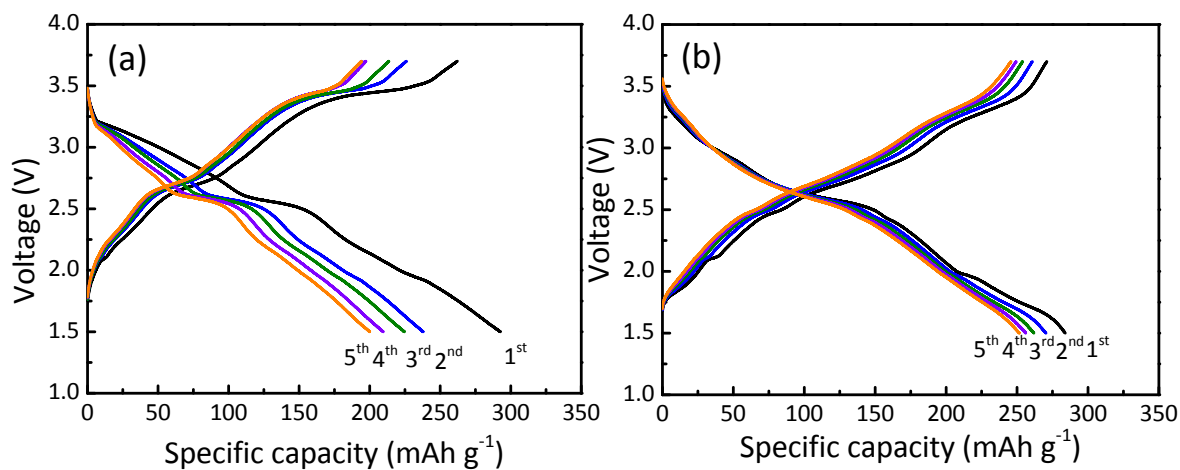

**Fig. S6** The first 5 discharge-charge curves of (a) the pure SVO without graphene and (b) the SVO-graphene (40) hybrid at 50 mA g<sup>-1</sup> over a potential window of 1.5 V-3.7 V vs. Li/ Li<sup>+</sup>.

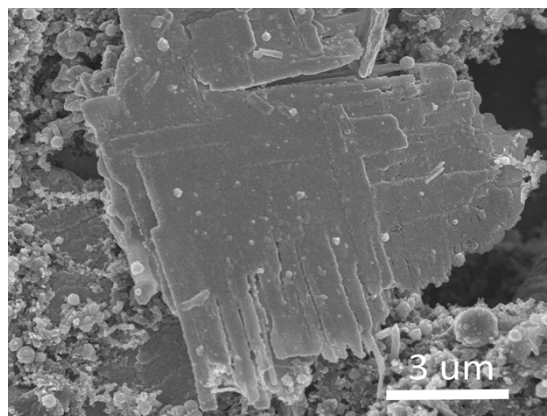

**Fig. S7** Typical SEM image of the SVO-graphene (40) hybrid electrode material after 50 cycles.

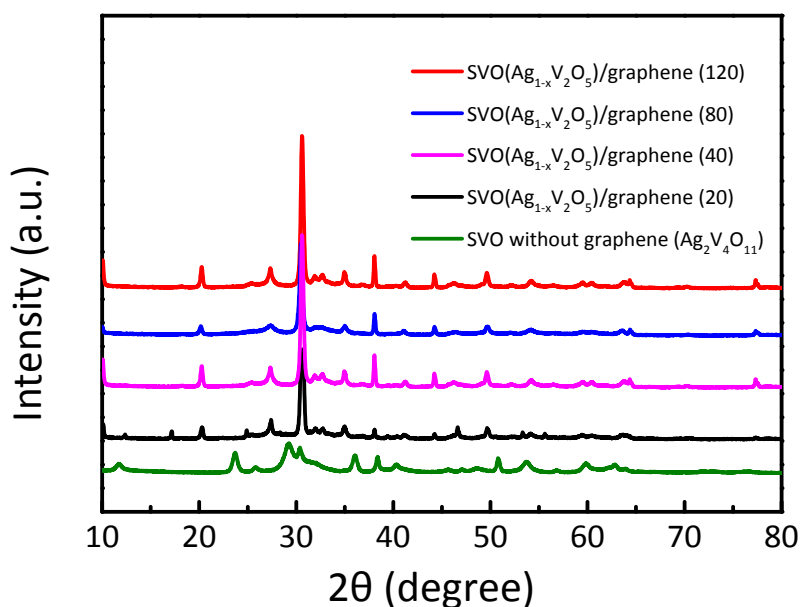

**Fig. S8** XRD patterns of the pure SVO without graphene and the SVO-graphene hybrids with different contents of GO. The formation of  $\text{Ag}_{1-x}\text{V}_2\text{O}_5$  after graphene added is possibly due to some  $\text{Ag}^+$  were reduced into Ag, resulting in the amount of  $\text{Ag}^+$  that participates in the formation of SVO is insufficient.

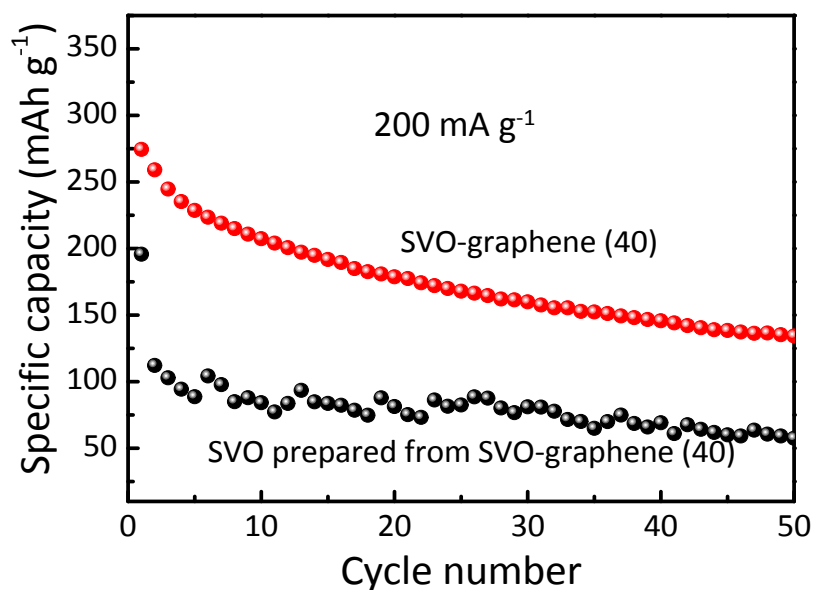

**Fig. S9** The comparison of the electrochemical performance of SVO-graphene (40) and SVO prepared by the removal of graphene from SVO-graphene (40) through calcining it in air at 450 °C for 2 h.

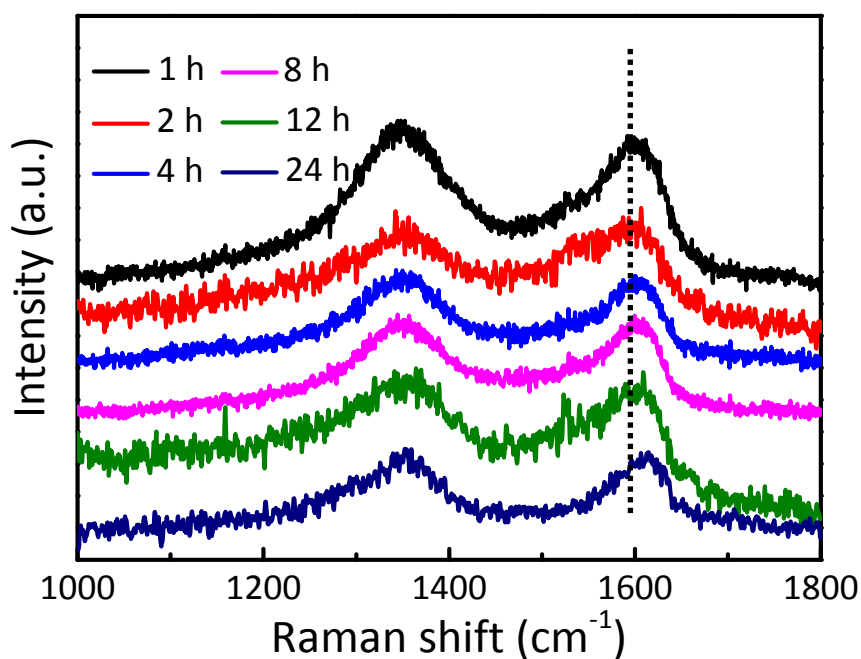

**Fig. S10** Raman spectra of the SVO-graphene (40) hybrid prepared in different hydrothermal treatment time.

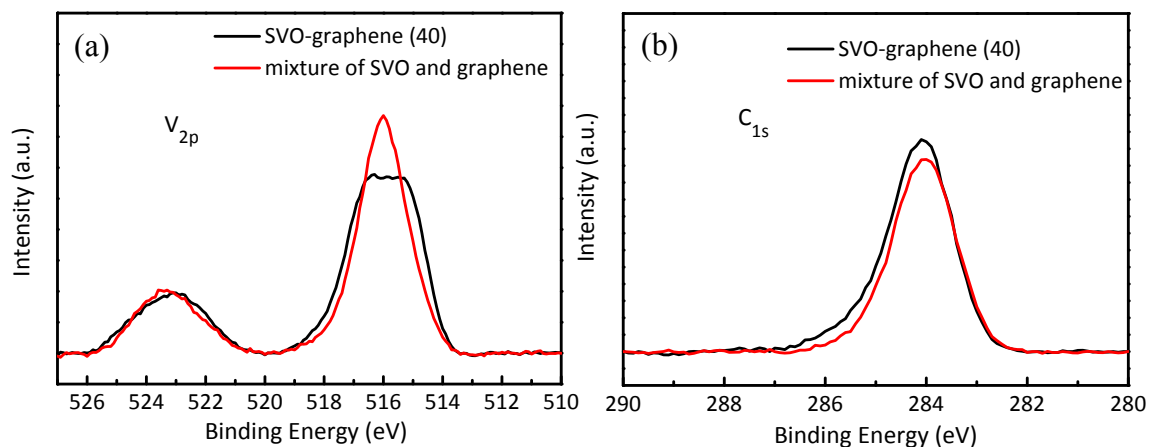

**Fig. S11** (a)  $V_{2p}$  and (b)  $C_{1s}$  XPS profiles of SVO-graphene (40) hybrid and a simple mixture of SVO and graphene.

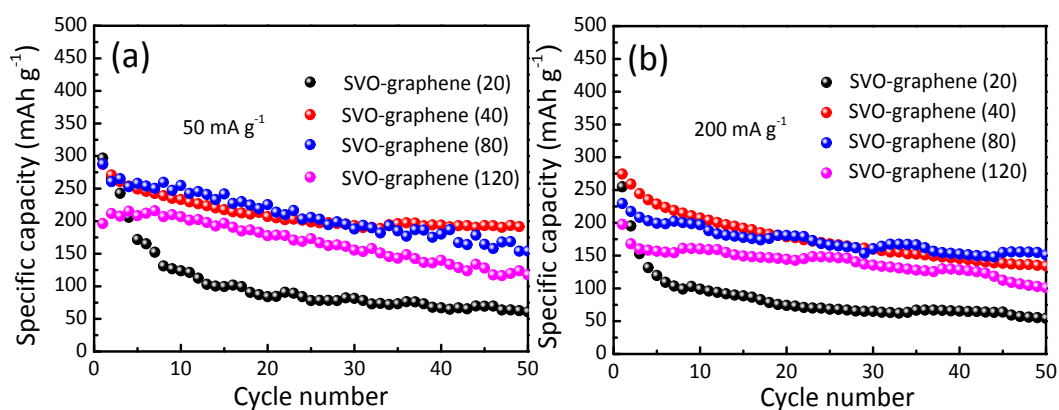

**Fig. S12** The comparison of the cycling behavior of the SVO-graphene hybrids added with different content of GO: 20 mg, 40 mg, 80 mg, 120 mg at (a)  $50 \text{ mA g}^{-1}$ , (b)  $200 \text{ mA g}^{-1}$  with a potential window of 1.5V-3.7 V vs.  $\text{Li}/\text{Li}^+$ .



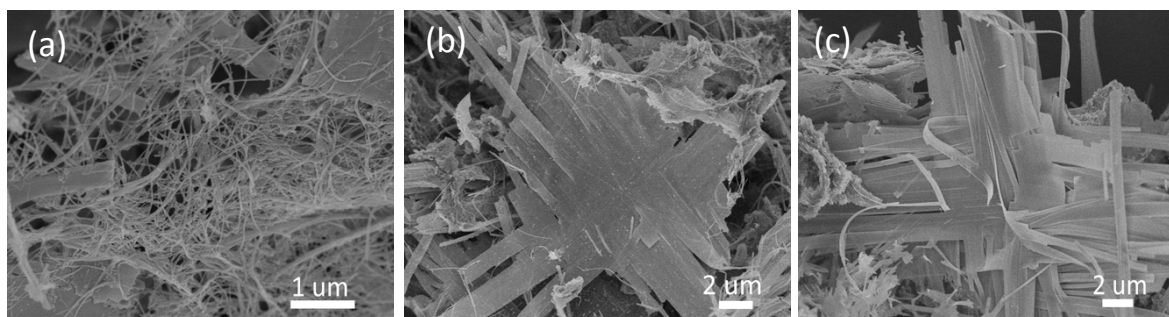

**Fig. S13** Typical SEM images of the SVO-graphene hybrids prepared by adding different contents of GO: (a) 20 mg, (b) 80 mg, (c) 120 mg.

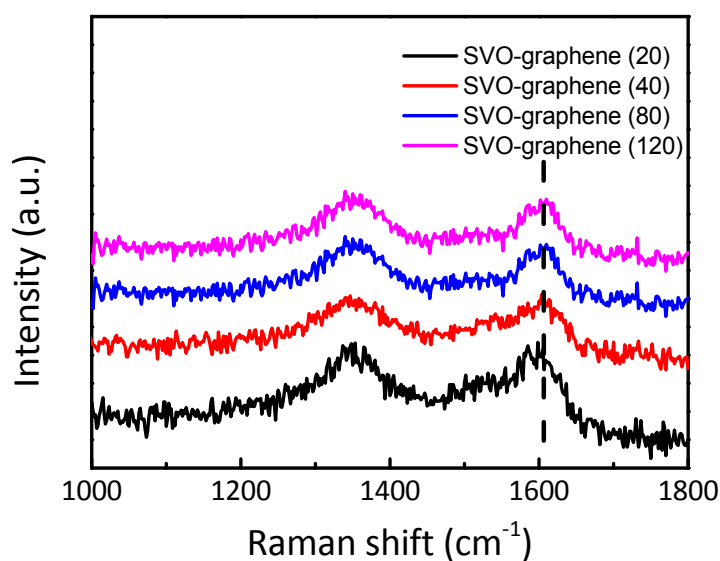

**Fig. S14** Raman spectra of the SVO-graphene hybrids with different contents of GO.

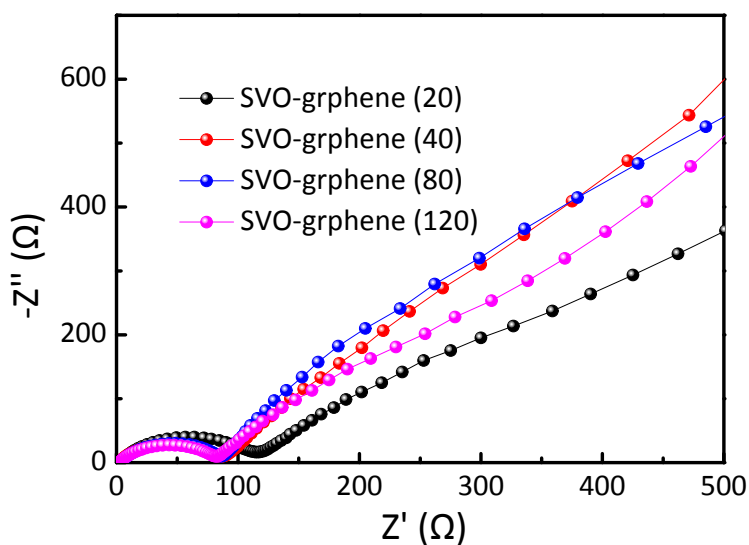

**Fig. S15** EIS profiles of the SVO-graphene hybrids with different contents of GO.
